# Supplementary material for: Muskuloskeletale Erkrankungen und die kraniomandibuläre Dysfunktion – eine mögliche Ursache für nichterholsamen Schlaf
Source: Springer Nature journal article supplement (doi:10.1007/s00337-021-00794-7), 2021-06-07
Supplement: MOESM1 [file 19235564]

**Tabelle 6:** Intraorale, extraorale und dysfunktionale Zeichen bei 606 CMD-CCD-Patienten mit schlechtem Schlaf

| <b>CMD-CCD-Zeichen</b>                                                                                                           | <b>Anzahl der Patienten absolut</b> | <b>Anzahl der Patienten in %</b> |
|----------------------------------------------------------------------------------------------------------------------------------|-------------------------------------|----------------------------------|
| Engstände in der Unterkieferfront                                                                                                | 527                                 | 86,8                             |
| Retrallage UK                                                                                                                    | 540                                 | 89,0                             |
| Mittellinienabweichung                                                                                                           | 411                                 | 67,7                             |
| Schmelzfacetten                                                                                                                  | 595                                 | 98,0                             |
| Gingivarezessionen                                                                                                               | 590                                 | 97,2                             |
| Tiefe/ungünstige Spee-Kurve                                                                                                      | 395                                 | 65,1                             |
| Gesichtsskoliose                                                                                                                 | 412                                 | 67,9                             |
| Pathologische Seitenabweichung beim Öffnen und/oder Schließen mit > 2 mm                                                         | 540                                 | 89,0                             |
| Mundöffnung eingeschränkt (< 40 mm)                                                                                              | 63                                  | 10,4                             |
| Protrusion eingeschränkt (< 9 mm)                                                                                                | 229                                 | 37,7                             |
| Seitbewegung links und/oder rechts eingeschränkt (< 9 mm)                                                                        | 159                                 | 26,2                             |
| Kiefergelenkknacken (vom Patienten angegeben)                                                                                    | 452                                 | 74,5                             |
| Kopfvorhaltung                                                                                                                   | 599                                 | 98,7                             |
| Schulterschiefstand                                                                                                              | 603                                 | 99,3                             |
| Beinlängendifferenz im Ausgangszustand                                                                                           | 599                                 | 97,9                             |
| Hüftblockade                                                                                                                     | 606                                 | 100                              |
| Hüftabduktionstest nach Patrick Kubis bei 942 CMD-CCD-Patienten im Schnitt im Ausgangszustand (rechte und linke Seite gemittelt) | 38,7 Grad                           |                                  |
