# Supplementary material for: Muskuloskeletale Erkrankungen und die kraniomandibuläre Dysfunktion – eine mögliche Ursache für nichterholsamen Schlaf
Source: Springer Nature journal article supplement (doi:10.1007/s00337-021-00794-7), 2021-06-07
Supplement: MOESM2 [file 19235564]

**Tabelle 7:** Schmerzlokalisierung im WPI bei 606 CMD-CCD-Patienten mit schlechtem Schlaf (im Schnitt 7,9 Schmerzorte)

| Körperregion          | Anzahl in %<br>und absolut | Körperregion         | Anzahl in %<br>und absolut |
|-----------------------|----------------------------|----------------------|----------------------------|
| Schultergürtel links  | 64,1<br>n=389              | Unterschenkel links  | 26,4<br>n=160              |
| Schultergürtel rechts | 70,3<br>n=427              | Unterschenkel rechts | 29,2<br>n=177              |
| Oberarm links         | 12,0<br>n=73               | Rücken links         | 68,9<br>n=418              |
| Oberarm rechts        | 12,7<br>n=77               | Rücken rechts        | 71,1<br>n=435              |
| Unterarm links        | 16,0<br>n=97               | Wange links          | 81,5<br>n=495              |
| Unterarm rechts       | 16,8<br>n=102              | Wange rechts         | 81,5<br>n=495              |
| Hüfte links           | 27,7<br>n=168              | Nacken               | 91,1<br>n=553              |
| Hüfte rechts          | 30,6<br>n=186              | Bauch                | 5,1<br>n=31                |
| Oberschenkel links    | 33,6<br>n=204              | Brust                | 10,5<br>n=64               |
| Oberschenkel rechts   | 35,4<br>n=215              |                      |                            |
