# Supplementary material for: Muskuloskeletale Erkrankungen und die kraniomandibuläre Dysfunktion – eine mögliche Ursache für nichterholsamen Schlaf
Source: Springer Nature journal article supplement (doi:10.1007/s00337-021-00794-7), 2021-06-07
Supplement: MOESM3 [file 19235564]

**Tabelle 8:** Beschwerden und Schmerzsymptome bei 942 CMD-CCD-Patienten im Vergleich zu 336 Gutschläfern, den 606 Schlechtschläfern insgesamt und die Schlechtschläfer gegliedert in mit und ohne FMS

| Beschwerden,<br>Schmerzsymptome                                           | 336<br>CMD-CCD-Pat.<br><b>ohne</b><br>Schlafstörungen<br><br>in % und<br>absolut | 606<br>CMD-CCD-Pat.<br><b>mit</b><br>Schlafstörungen<br><br>in % und<br>absolut | 58<br>CMD-CCD-Pat.<br>mit<br>Schlafstörungen<br>und<br><b>ohne FMS</b><br><br>in % und<br>absolut | 548<br>CMD-CCD-Pat.<br>mit<br>Schlafstörungen<br>und<br><b>mit FMS</b><br><br>in % und<br>absolut |
|---------------------------------------------------------------------------|----------------------------------------------------------------------------------|---------------------------------------------------------------------------------|---------------------------------------------------------------------------------------------------|---------------------------------------------------------------------------------------------------|
| Mund-, Zahn-,<br>Kieferschmerzen<br><b>ohne</b> Schmerzen<br>Kiefergelenk | 67,3%<br>n=226                                                                   | 73,3%<br>n=445                                                                  | <b>37,9%</b><br>n=22                                                                              | <b>77,2%</b><br>n=423                                                                             |
| Kiefergelenk-<br>schmerzen                                                | 35,7%<br>n=120                                                                   | 51,1%<br>n=310                                                                  | <b>24,1%</b><br>n=14                                                                              | <b>54,0%</b><br>n=296                                                                             |
| <b>Stumme CMD</b>                                                         | 27,1%<br>n=91                                                                    | 19,8%<br>n=120                                                                  | <b>53,4%</b><br>n=31                                                                              | 16,1%<br>n=88                                                                                     |
| Körperschmerzen<br>insgesamt                                              | 100%<br>n=336                                                                    | 100%<br>n=606                                                                   | 100%<br>n=58                                                                                      | 100%<br>n=548                                                                                     |
| Kopfschmerzen                                                             | 56,3%<br>n=189                                                                   | 76,6%<br>n=465                                                                  | <b>48,3%</b><br>n=28                                                                              | <b>79,7%</b><br>n=437                                                                             |
| Nackenschmerzen                                                           | 80,1%<br>n=269                                                                   | 91,1%<br>n=553                                                                  | <b>69,0%</b><br>n=40                                                                              | <b>93,6%</b><br>n=513                                                                             |
| Rückenschmerzen                                                           | 59,8%<br>n=201                                                                   | 74,5%<br>n=452                                                                  | <b>39,7%</b><br>n=23                                                                              | <b>78,3%</b><br>n=429                                                                             |
| Hüftschmerzen                                                             | 21,4%<br>n=72                                                                    | 38,9%<br>n=236                                                                  | <b>5,2%</b><br>n=3                                                                                | <b>42,5%</b><br>n=233                                                                             |
| Knieschmerzen                                                             | 31,0%<br>n=104                                                                   | 38,1%<br>n=231                                                                  | <b>6,9%</b><br>n=4                                                                                | <b>41,4%</b><br>n=227                                                                             |
| Tinnitus                                                                  | 32,7%<br>n=110                                                                   | 47,1%<br>n=286                                                                  | 36,2%<br>n=21                                                                                     | 48,4%<br>n=265                                                                                    |

|                                                                             |                |                |               |                |
|-----------------------------------------------------------------------------|----------------|----------------|---------------|----------------|
| Ohrprobleme,<br>Otalgie                                                     | 33,9%<br>n=114 | 46,8%<br>n=284 | 17,2%<br>n=10 | 50,0%<br>n=274 |
| Schluckbeschwerden                                                          | 8,3%<br>n=28   | 17,0%<br>n=103 | 6,9%<br>n=4   | 18,1%<br>n=99  |
| Schwindel                                                                   | 31,3%<br>n=105 | 47,0%<br>n=285 | 19,0%<br>n=11 | 49,8%<br>n=273 |
| Zähneknirschen,<br>Zähnepressen<br><br>Keine signifikanten<br>Unterschiede! | 49,4%<br>n=166 | 53,7%<br>n=326 | 46,6%<br>n=27 | 54,6%<br>n=299 |
| Kiefergelenkknacken<br>(vom Patienten<br>angegeben)                         | 84,8%<br>n=285 | 74,5%<br>n=452 | 84,5%<br>n=49 | 73,5%<br>n=403 |
