# Supplementary material for: Muskuloskeletale Erkrankungen und die kraniomandibuläre Dysfunktion – eine mögliche Ursache für nichterholsamen Schlaf
Source: Springer Nature journal article supplement (doi:10.1007/s00337-021-00794-7), 2021-06-07
Supplement: MOESM4 [file 19235564]

**Table 9:** Besserung der Körperbeschwerden bei 120 CMD-CCD-Patienten mit schlechtem Schlaf mit **stummer CMD** durch die kombinierte und zeitgleiche Behandlung der CMD/CCD

Gute Besserung = Besserung 50–70%, sehr gute Besserung = Besserung >70%,

| Schmerz-,<br>Beschwerdesymptome      | Anzahl der<br>stummen<br>CMD-Pat. | keine<br>Besserung            | gute bis sehr<br>gute Besserung |
|--------------------------------------|-----------------------------------|-------------------------------|---------------------------------|
| <b>Körperschmerzen<br/>insgesamt</b> | <b>100%</b><br><b>(n=120)</b>     | <b>4,2%</b><br><b>(n=5)</b>   | <b>86,7%</b><br><b>(n=104)</b>  |
| Nackenschmerzen                      | <b>83,3%</b><br><b>(n=100)</b>    | <b>6,0%</b><br><b>(n=6)</b>   | <b>89,0%</b><br><b>(n=89)</b>   |
| Rückenschmerzen                      | <b>64,2%</b><br><b>(n=77)</b>     | <b>9,1%</b><br><b>(n=7)</b>   | <b>79,2%</b><br><b>(n=61)</b>   |
| Hüftschmerzen                        | <b>21,7%</b><br><b>(n=26)</b>     | <b>3,8%</b><br><b>(n=1)</b>   | <b>80,7%</b><br><b>(n=21)</b>   |
| Knieschmerzen                        | <b>25,0%</b><br><b>(n=30)</b>     | <b>13,3%</b><br><b>(n=4)</b>  | <b>73,3%</b><br><b>(n=22)</b>   |
| Kopfschmerzen                        | <b>59,2%</b><br><b>(n=71)</b>     | <b>8,5%</b><br><b>(n=6)</b>   | <b>87,3%</b><br><b>(n=62)</b>   |
| Ohrprobleme, Otagie                  | <b>26,7%</b><br><b>(n=32)</b>     | <b>12,5%</b><br><b>(n=4)</b>  | <b>84,4%</b><br><b>(n=27)</b>   |
| Tinnitus                             | <b>41,7%</b><br><b>(n=50)</b>     | <b>44,0%</b><br><b>(n=22)</b> | <b>46,0%</b><br><b>(n=23)</b>   |
| Schluckbeschwerden                   | <b>6,7%</b><br><b>(n=8)</b>       | <b>25,0%</b><br><b>(n=2)</b>  | <b>75%</b><br><b>(n=6)</b>      |

|                                |                                 |                               |                               |
|--------------------------------|---------------------------------|-------------------------------|-------------------------------|
| Schwindel                      | <b>34,2%</b><br><b>(n=41 )</b>  | <b>7,3%</b><br><b>(n=3)</b>   | <b>82,9%</b><br><b>(n=34)</b> |
| Schlechter Schlaf,<br>Insomnie | <b>100,0%</b><br><b>(n=120)</b> | <b>21,7%</b><br><b>(n=26)</b> | <b>78,3%</b><br><b>(n=94)</b> |
