# Supplementary material for: Muskuloskeletale Erkrankungen und die kraniomandibuläre Dysfunktion – eine mögliche Ursache für nichterholsamen Schlaf
Source: Springer Nature journal article supplement (doi:10.1007/s00337-021-00794-7), 2021-06-07
Supplement: MOESM5 [file 19235564]

**Tabelle 10:** Intraorale, extraorale und dysfunktionale Zeichen bei 120 CMD-CCD-Patienten mit schlechtem Schlaf ohne CMD-Schmerzen (stumme CMD)

| <b>Intraorale, extraorale und dysfunktionale Zeichen bei stummer CMD</b>                               | <b>Anzahl der Patienten absolut</b> | <b>Anzahl der Patienten in %</b> |
|--------------------------------------------------------------------------------------------------------|-------------------------------------|----------------------------------|
| Engstände in der Unterkieferfront                                                                      | 106                                 | 88,3                             |
| Retrallage UK                                                                                          | 108                                 | 90,0                             |
| Mittellinienabweichung                                                                                 | 76                                  | 63,3                             |
| Schmelzfacetten                                                                                        | 116                                 | 96,7                             |
| Gingivarezessionen                                                                                     | 118                                 | 98,3                             |
| Tiefe/ungünstige Spee-Kurve                                                                            | 79                                  | 65,8                             |
| Gesichtsskoliose                                                                                       | 86                                  | 71,7                             |
| Pathologische Seitenabweichung beim Öffnen und/oder Schließen mit > 2 mm                               | 106                                 | 88,3                             |
| Mundöffnung eingeschränkt (< 40 mm)                                                                    | 10                                  | 8,3                              |
| Protrusion eingeschränkt (< 9 mm)                                                                      | 43                                  | 35,8                             |
| Seitbewegung links und /oder rechts eingeschränkt (<9 mm)                                              | 24                                  | 20,0                             |
| Kiefergelenkknacken (vom Patienten angegeben)                                                          | 71                                  | 59,2                             |
| Kopfvorhaltung                                                                                         | 119                                 | 99,2                             |
| Schulterschiefstand                                                                                    | 120                                 | 100,0                            |
| Beinlängendifferenz im Ausgangszustand                                                                 | 118                                 | 98,3                             |
| Hüftblockade                                                                                           | 120                                 | 100,0                            |
| Hüftabduktionstest nach Patrick Kubis im Schnitt im Ausgangszustand (rechte und linke Seite gemittelt) | 37,9 Grad                           |                                  |
| <b>NRS-Skala von 1 – 10, im Schnitt</b>                                                                | 7,9                                 |                                  |

|                                                                                                                                                                                                                                          |     |       |
|------------------------------------------------------------------------------------------------------------------------------------------------------------------------------------------------------------------------------------------|-----|-------|
| <b>Symptomschwerescore</b><br><b>(in der Summe und im Schnitt)</b>                                                                                                                                                                       | 8,9 |       |
| <b>WPI im Schnitt</b>                                                                                                                                                                                                                    | 5,1 |       |
| <b>WPI und weitere Komorbiditäten</b><br>(Insomnie, Kopfschmerzen, Schwindel,<br>Ohrprobleme, Tinnitus,<br>Schluckstörungen, Stimmstörungen,<br>Augen-Sehstörungen, vegetative<br>Symptome, depressive<br>Verstimmung) <b>im Schnitt</b> | 9,2 |       |
| <b>Großflächiger Körperschmerz</b><br><b>(Schmerzen in 3 und 4</b><br><b>Körperquadranten)</b>                                                                                                                                           | 54  | 45,0% |
| <b>FMS nach AWMF 2012</b>                                                                                                                                                                                                                | 88  | 73,3  |
